# Supplementary material
Source: publisher figshare collection journal article supplement (https://asha.figshare.com/ndownloader/files/36664920)
Supplement: Supplementary file 1 [file 36664920]

**Supplemental Material S1. Adverse event types by SLI status.**

| <b>Trauma Type</b>                                                  | <b>TL (n = 24)</b> | <b>SLI (n = 6)</b> |
|---------------------------------------------------------------------|--------------------|--------------------|
| Changes in the Family/Social Environment                            |                    |                    |
| New child in home                                                   | 50.00%             | 33.33%             |
| Caregiver separation                                                | 33.33%             | 33.33%             |
| Caregiver divorce                                                   | 16.67%             | 0.00%              |
| New parental figure                                                 | 16.67%             | 16.67%             |
| Moved to new home                                                   | 37.50%             | 50.00%             |
| Change in daycare/childcare                                         | 45.84%             | 33.33%             |
| Lost contact with someone they cared about because of move          | 8.33%              | 0.00%              |
| Forced to leave home when not planned/wanted                        | 20.83%             | 0.00%              |
| Moved to a new country                                              | 0.00%              | 0.00%              |
| Caregiver admitted to medical hospital                              | 20.83%             | 0.00%              |
| Caregiver diagnosed with mental illness                             | 16.67%             | 50.00%             |
| Caregiver has issue with alcoholism or drug use                     | 12.50%             | 0.00%              |
| Caregiver arrested                                                  | 16.67%             | 3.33%              |
| Family member in prison                                             | 25.00%             | 33.33%             |
| Removed from home due to neglect                                    | 4.17%              | 0.00%              |
| Removed from home due to physical abuse                             | 4.17%              | 0.00%              |
| Removed from home due to sexual abuse                               | 0.00%              | 0.00%              |
| Removed from home due to emotional abuse                            | 0.00%              | 0.00%              |
| Exposure to Loss/Death                                              |                    |                    |
| Death of pet                                                        | 33.33%             | 16.67%             |
| Death of caregiver                                                  | 8.33%              | 0.00%              |
| Death of other close adult                                          | 20.83%             | 16.67%             |
| Death of sibling                                                    | 8.33%              | 0.00%              |
| Death of peer/friend                                                | 4.17%              | 0.00%              |
| Witnessed violent death or severe physical injury of another person | 4.17%              | 0.00%              |
| Suicide of someone close                                            | 12.50%             | 0.00%              |
| Physical Injuries/Accidents/Hospital Admissions                     |                    |                    |
| Car accident                                                        | 8.33%              | 33.33%             |
| Hit by car (while on foot/bike)                                     | 0.00%              | 0.00%              |
| Poisoned                                                            | 0.00%              | 0.00%              |
| Been in a serious fire                                              | 0.00%              | 0.00%              |
| Burned                                                              | 4.17%              | 0.00%              |
| Almost drowned                                                      | 0.00%              | 0.00%              |

| <b>Trauma Type</b>                                      | <b>TL (<i>n</i> = 24)</b> | <b>SLI (<i>n</i> = 6)</b> |
|---------------------------------------------------------|---------------------------|---------------------------|
| Serious fall                                            | 0.00%                     | 0.00%                     |
| Animal attack                                           | 0.00%                     | 0.00%                     |
| Broken bones                                            | 4.17%                     | 0.00%                     |
| Gotten seriously sick                                   | 8.33%                     | 0.00%                     |
| Diagnosed with chronic physical illness                 | 25.00%                    | 16.67%                    |
| Admitted to medical or psychiatric hospital             | 20.83%                    | 0.00%                     |
| <b>Violence/Witnessing Violence</b>                     |                           |                           |
| Involved in war/terrorism                               | 0.00%                     | 0.00%                     |
| Physically attacked or injured by another child         | 0.00%                     | 16.67%                    |
| Robbed or mugged                                        | 0.00%                     | 0.00%                     |
| Kidnapped or taken hostage                              | 0.00%                     | 0.00%                     |
| Exposure to domestic violence                           | 12.50%                    | 0.00%                     |
| Exposed to neighborhood/community violence              | 4.17%                     | 16.67%                    |
| Witnessed trauma of another person                      | 4.17%                     | 0.00%                     |
| Heard about trauma of another person                    | 12.50%                    | 33.33%                    |
| <b>Maltreatment</b>                                     |                           |                           |
| Experienced physical abuse                              | 16.67%                    | 3.33%                     |
| Experienced sexual abuse                                | 0.00%                     | 0.00%                     |
| Experienced physical neglect                            | 4.17%                     | 0.00%                     |
| Experience supervisory neglect                          | 0.00%                     | 0.00%                     |
| Experienced emotional abuse                             | 0.00%                     | 0.00%                     |
| <b>Poverty-Related Factors</b>                          |                           |                           |
| Experienced significant reduction in standard of living | 16.67%                    | 33.33%                    |
| Attended childcare in unsafe neighborhood               | 4.17%                     | 16.67%                    |
| <b>Discrimination</b>                                   |                           |                           |
| Consistently ignored by peers                           | 0.00%                     | 16.67%                    |
| Discriminated against or harassed                       | 0.00%                     | 16.67%                    |
| <b>Other</b>                                            |                           |                           |
| Victim of natural disaster                              | 0.00%                     | 0.00%                     |
